# Supplementary material
Source: publisher figshare collection journal article supplement (https://frontiersin.figshare.com/ndownloader/files/22628762)
Supplement: Supplementary file [file 22628762]

## Supplementary Figure S2

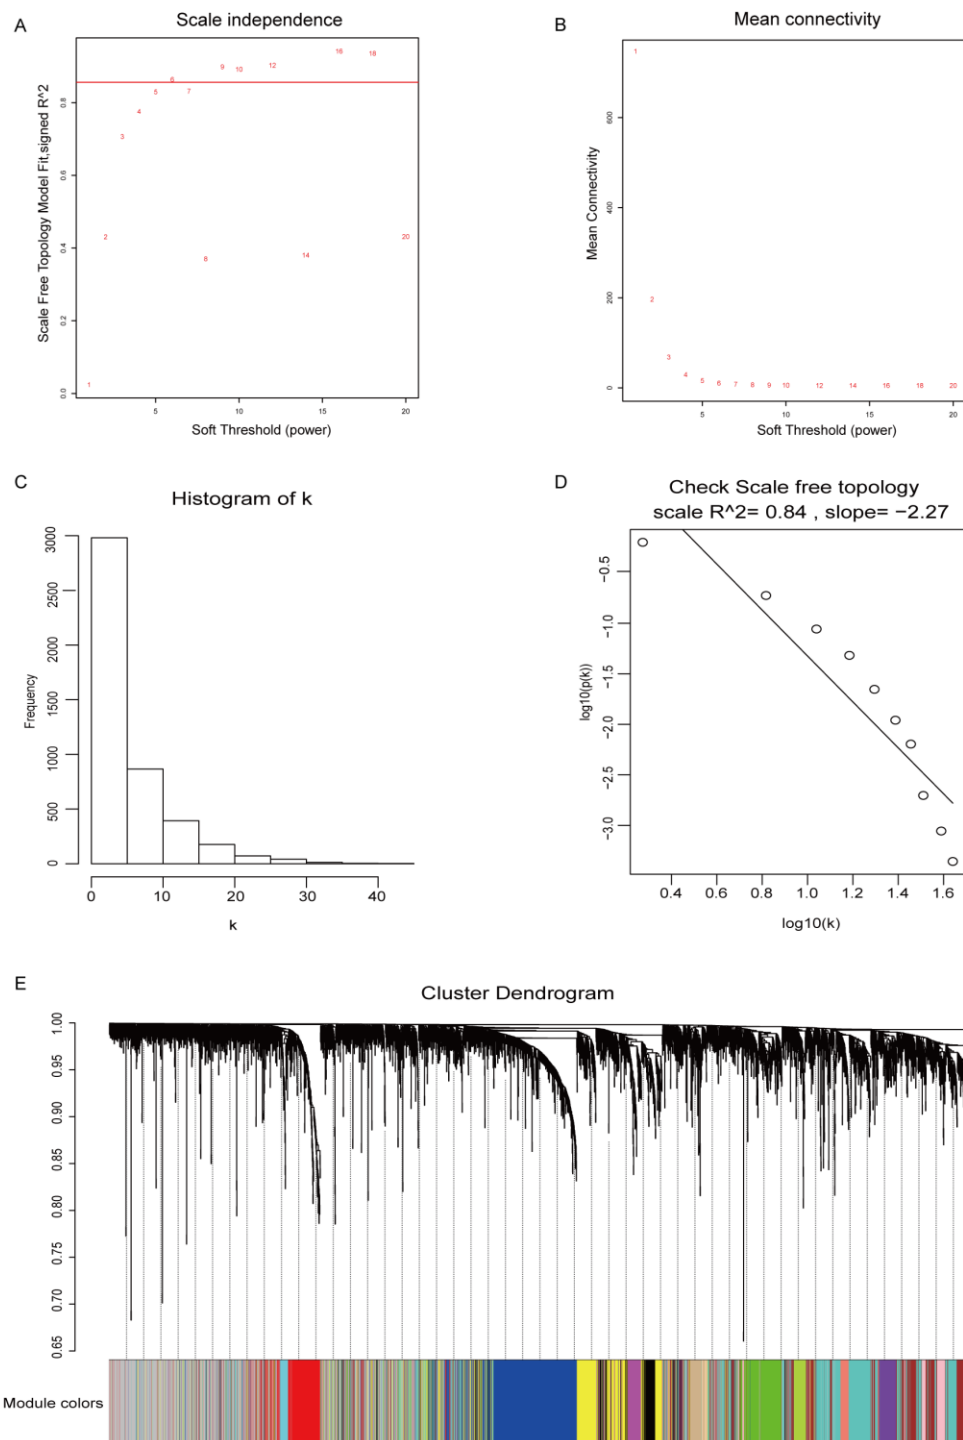

Supplementary Figure S2: DEL weighted gene co-expression network construction. (A-B) The scale-free fit index and the mean connectivity with various soft-thresholding powers. (C-D) Histogram of connectivity distributions and check scale-free topology when  $\beta = 6$ . (E) DEL clustering dendrograms.
